# Supplementary material for: Development of novel bone targeting peptide–drug conjugate of 13-aminomethyl-15-thiomatrine for osteoporosis therapy
Source: Royal Society of Chemistry journal article supplement (doi:10.1039/d1ra08136e), 2021-12-20
Supplement: d1ra08136e1.pdf [file d1ra08136e1.pdf]

## Supporting Information

### Development of Novel Bone Targeting Peptide-Drug Conjugate of 13-aminomethyl-15-thiomatine for Osteoporosis Therapy

Jia Su<sup>a†</sup>, Chao Liu<sup>b†</sup>, Haohao Bai<sup>b</sup>, Wei Cong<sup>b</sup>, Hua Tang<sup>b</sup>, Honggang Hu<sup>b</sup>, Li Su<sup>b\*</sup>, Shipeng He<sup>b\*</sup>  
and Yong Wang<sup>a\*</sup>

<sup>a</sup> *Department of Orthopaedics, Wenzhou Hospital of Integrated Traditional Chinese and Western Medicine, Zhejiang, China.*

<sup>b</sup> *Institute of Translational Medicine, Shanghai University, Shanghai, China.*



**Scheme S1.** The synthesis route of **BTM19-4**. Reagents and conditions: a) TFE/DCM (1:3, v/v), rt, 4 h, 87%; b) 4-aminophenyl methanol, HOBT, DIC, DMF, rt, 2 h, 74%; c) i) Triphosgene, activated carbon, THF, rt, 12 h; ii) **M19**, Et<sub>3</sub>N, DMF, rt, 12 h, 76% in two steps; d) TFA/water/EDT/TIPs (95:2:2:1, v/v/v/v), rt, 2 h, 59%.



**Figure S1.** (A) Illustration of the chemical stability study of M19 vs. PDCs in water/MeCN solution at room temperature; Chromatograms of chemical stability study of M19 (B), BTM19-1 (C), BTM19-2 (D), BTM19-3 (E).



**Figure S2.** (A) Mechanism of the drug release from self-immolative spacer PABC and Cathepsin K substrate; Chromatograms of drug release study of **BTM19-1** (B), **BTM19-2** (C) and **BTM19-3** (D) at pH 5.5 (37 °C) with cathepsin K.



**Figure S3.** Chromatograms of proteolytic stability study of **BTM19-1** (A), **BTM19-2** (B), **BTM19-3** (C) under  $\alpha$ -chymotrypsin treatment.



**Figure S4.** Chromatograms of binding study of **BTM19-1** (A), **BTM19-2** (B), **BTM19-3** (C) and **BTM19-4** (D) to hydroxyapatite at pH=5.5 and 37 °C.



**Figure S5.** Quantification data of cytotoxic study after **M19** (A), **BTM19-1** (B), **BTM19-2** (C) and **BTM19-3** (D) treatment on RAW264.7 cell measured by CCK-8 assay. Data points are displayed as the mean value SEM of duplicate independent experiments. (\* $P < 0.05$ , \*\* $P < 0.01$ , \*\*\* $P < 0.001$ ).



**Figure S6.** Formation of TRAP-positive cells from RAW264.7 cells with RANKL, M-CSF and treated with **M19** (A), **BTM19-1** (B), **BTM19-2** (C) and **BTM19-3** (D).



**Figure S7.** **6** as white powder, 1.43 g, 82% yield. **A)** Structure of **BTM19-1-2**; **B)** HPLC trace of purified **BTM19-1-2**. Gradient: 90-0% of buffer B in 20 min with C18 column (5  $\mu$ m, 2.5 mm $\times$ 250 mm). **C)** HR-MS spectrum of **BTM19-1-2** (calcd. for  $C_{81}H_{132}N_{12}O_{28}S$  1752.8995; found  $[M+2H]^{2+}$  877.4609).



**Figure S8.** **7** as white powder, 1.12 g, 79% yield. **A)** Structure of **BTM19-1-3**; **B)** HPLC trace of purified **BTM19-1-3**. Gradient: 90-0% of buffer B in 20 min with C18 column (5  $\mu$ m, 2.5 mm $\times$ 250 mm). **C)** HR-MS spectrum of **BTM19-1-3** (calcd. for  $C_{88}H_{139}N_{13}O_{28}S$  1857.9573; found  $[M+2H]^{2+}$  929.9841).



**Figure S9.** **8** as white powder, 1.1 g, 78% yield. **A)** Structure of **BTM19-1-4**; **B)** HPLC trace of purified **BTM19-1-4**. Gradient: 90-0% of buffer B in 20 min with C18 column (5  $\mu$ m, 2.5 mm $\times$ 250 mm). **C)** HR-MS spectrum of **BTM19-1-4** (calcd. for C<sub>105</sub>H<sub>164</sub>N<sub>16</sub>O<sub>29</sub>S<sub>2</sub> 2177.1292; found [M+2H]<sup>2+</sup> 1089.5528).



**Figure S10.** **BTM19-1** as lyophilized white powder, 492 mg, 62% yield. **A)** Structure of **BTM19-1**; **B)** HPLC trace of purified **BTM19-1**. Gradient: 90-0% of buffer B in 15 min with C18 column (5  $\mu$ m, 2.5 mm $\times$ 250 mm). **C)** HR-MS spectrum of **BTM19-**



**1** (calcd. for  $C_{68}H_{100}N_{16}O_{26}S$  1588.6715; found  $[M+H]^+$  1589.6329).



**Figure S11.** **9** as white powder, 1.5 g, 83% yield. **A)** Structure of **BTM19-2-2**; **B)** HPLC trace of purified **BTM19-2-2**. Gradient: 90-0% of buffer B in 20 min with C18 column ( $5\ \mu\text{m}$ ,  $2.5\ \text{mm}\times 250\ \text{mm}$ ). **C)** HR-MS spectrum of **BTM19-2-2** (calcd. for  $C_{83}H_{136}N_{12}O_{29}S$  1796.9257; found  $[M+2H]^{2+}$  899.4961).



**Figure S12.** **10** as white powder, 1.18 g, 75% yield. **A)** Structure of **BTM19-2-3**; **B)** HPLC trace of purified **BTM19-2-3**. Gradient: 90-0% of buffer B in 20 min with C18 column ( $5\ \mu\text{m}$ ,  $2.5\ \text{mm}\times 250\ \text{mm}$ ). **C)** HR-MS spectrum of **BTM19-2-3** (calcd. for  $C_{90}H_{143}N_{13}O_{29}S$  1901.9835; found  $[M+2H]^{2+}$  951.9905).



**Figure S13.** **11** as white powder, 1.07 g, 85% yield. **A)** Structure of **BTM19-2-4**; **B)** HPLC trace of purified **BTM19-2-4**. Gradient: 90-0% of buffer B in 20 min with C18 column (5  $\mu$ m, 2.5 mm $\times$ 250 mm). **C)** HR-MS spectrum of **BTM19-2-4** (calcd. for  $C_{107}H_{168}N_{16}O_{30}S_2$  2221.1554; found  $[M+2H]^{2+}$  1111.5709).



**Figure S14.** **BTM19-2** as lyophilized white powder, 493 mg, 63% yield. **A)** Structure of **BTM19-2**; **B)** HPLC trace of purified **BTM19-2**. Gradient: 90-0% of buffer B in 15 min with C18 column (5  $\mu$ m, 2.5 mm $\times$ 250 mm). **C)** HR-MS spectrum of **BTM19-2** (calcd. for  $C_{70}H_{104}N_{16}O_{27}S$  1632.9678; found  $[M+2H]^{2+}$  817.4979).



**Figure S15.** **12** as white powder, 1.47 g, 80% yield. **A)** Structure of **BTM19-3-2**; **B)** HPLC trace of purified **BTM19-3-2**. Gradient: 90-0% of buffer B in 20 min with C18 column (5  $\mu$ m, 2.5 mm $\times$ 250 mm). **C)** HR-MS spectrum of **BTM19-3-2** (calcd. for  $C_{85}H_{140}N_{12}O_{30}S$  1840.9519; found  $[M+2H]^{2+}$  921.4898).



**Figure S16.** **13** as white powder, 1.15 g, 74% yield. **A)** Structure of **BTM19-3-3**; **B)** HPLC trace of purified **BTM19-3-3**. Gradient: 90-0% of buffer B in 20 min with C18 column (5  $\mu$ m, 2.5 mm $\times$ 250 mm). **C)** HR-MS spectrum of **BTM19-3-3** (calcd. for  $C_{92}H_{147}N_{13}O_{30}S$  1946.0098; found  $[M+2H]^{2+}$  974.0215).



**Figure S17.** **14** as white powder 1.09 g, 86% yield. **A)** Structure of **BTM19-3-4**; **B)** HPLC trace of purified **BTM19-3-4**. Gradient: 90-0% of buffer B in 20 min with C18 column (5  $\mu$ m, 2.5 mm $\times$ 250 mm). **C)** HR-MS spectrum of **BTM19-3-4** (calcd. for  $C_{109}H_{172}N_{16}O_{31}S_2$  2265.1816; found  $[M+2H]^{2+}$  1133.5828).



**Figure S18.** **BTM19-3** as lyophilized white powder, 443 mg, 60% yield. **A)** Structure of **BTM19-3**; **B)** HPLC trace of purified **BTM19-3**. Gradient: 90-0% of buffer B in 15 min with C18 column (5  $\mu$ m, 2.5 mm $\times$ 250 mm). **C)** HR-MS spectrum of **BTM19-3** (calcd. for  $C_{72}H_{108}N_{16}O_{28}S$  1676.7240; found  $[M+2H]^{2+}$  839.3631).





**Figure S21.** **18** as white powder, 1.05 g, 76% yield. **A)** Structure of **BTM19-4-4**; **B)** HPLC trace of purified **BTM19-4-4**. Gradient: 90-0% of buffer B in 20 min with C18 column (5  $\mu$ m, 2.5 mm $\times$ 250 mm). **C)** HR-MS spectrum of **BTM19-4-4** (calcd. for  $C_{114}H_{182}N_{18}O_{25}S_2$  2267.2965; found  $[M+3H]^{3+}$  756.7441).



**Figure S22.** **BTM19-4** as lyophilized white powder, 458 mg, 59% yield. **A)** Structure of **BTM19-4**; **B)** HPLC trace of purified **BTM19-4**. Gradient: 90-0% of buffer B in 15 min with C18 column (5  $\mu$ m, 2.5 mm $\times$ 250 mm). **C)** HR-MS spectrum of **BTM19-4** (calcd. for  $C_{80}H_{126}N_{18}O_{20}S$  1690.9116; found  $[M+2H]^{2+}$  846.4346).



**Figure S23.** ESI-MS spectrum of **2** (calculated for  $C_{15}H_{22}N_2S$  262.15; found  $[M+H]^+$  263.2).



**Figure S24.**  $^1H$ -NMR data of **2**.



**Figure S25.**  $^{13}\text{C}$ -NMR data of **2**.



**Figure S26.** ESI-MS spectrum of **3** (calculated for  $\text{C}_{16}\text{H}_{27}\text{N}_3\text{S}$  293.19; found  $[\text{M}+\text{H}]^+$  294.2).





Figure S27.  $^1\text{H}$ -NMR data of **2**.



Figure S28.  $^{13}\text{C}$ -NMR data of **2**.
